# Supplementary material
Source: Royal Society of Chemistry journal article supplement (doi:10.1039/d5ya00341e)
Supplement: d5ya00341e1.xlsx [file d5ya00341e1.xlsx]

## Sheet: Cover Sheet
	SUPPLEMENTARY INFORMATION
	Life Cycle Assessment of Grid-Scale Battery Storage: Evaluating the Environmental Competitiveness of Sodium-Ion Systems
	Jasper, Friedrich B.1,2; Zhou, Yuhuan1; Ersoy, Hüseyin1; Baumann, Manuel J.1; Peters, Jens3;Neuhaus, Dirk Holger2,4; Weil, Marcel1,5
	1 Institute for Technology Assessment and Systems Analysis (ITAS), KIT, Karlsruhe, Germany
	² Department of Sustainable Systems Engineering (INATECH), University Freiburg, Germany
	³ Department of Economics, University of Alcalá, Alcalá de Henares, Spain
	4 Fraunhofer Institute for Solar Energy Systems (ISE), Freiburg, Germany
	5 Helmholtz-Institute for Electrochemical Energy Storage (HIU), KIT, Ulm, Germany
	This spreadsheet contains the life cycle inventories (LCI) of all processes modelled within the scope of this work and all numerical results for the Figures presented in the main manuscript.
	All data is published under CC-BY-NC license and free for re-use, as long as the source is properly cited.

## Sheet: Air-cooled CSS - Production
All processes are production processes. Therefore the reference flow is an output and the listed flows inputs, unless specified otherwise.
Reference	Full Life Cycle CSS (air cooling)
	Inputs
	Flow	Amount	Unit	Provider	Description	Avoided waste
	CSS (air cooling)	1	Item(s)	CSS (air cooling)
	Ouputs
	Flow	Amount	Unit	Provider	Description	Avoided product
	Life cycle CSS	1	Item(s)
	used CSS (air cooled)	1	Item(s)	treatment of used CSS (air cooled)
	CSS (air cooling)	1	Item(s)
	Flow	Amount	Unit	Provider	Description	Avoided waste
	Air cooling system	1	Item(s)	Air cooling system
	Battery rack (air cooling)	6	Item(s)	Battery rack (air cooling)
	BESS controller	30	kg	BESS controller
	concrete block	43.9	t	concrete block production | concrete block | Cutoff, U - DE
	Container	1	Item(s)	Container
	Fire supression system for 20 ft CSS	1	Item(s)	Fire suppression system for 20ft CSS
	Power conversion system for CSS	600	kg	Production of power conversion system for CSS
	transformer, for grid connection	4100	kg	transformer production, for grid connection
	Air cooling system	1	Item(s)
	Flow	Amount	Unit	Provider	Description	Avoided waste
	Air conditioner	514	kg	Air conditioner
	cooling in battery pack (air cooled)	144	Item(s)	production of cooling in battery pack (air cooled)
	transport, freight, lorry, 16-32 metric ton, diesel, EURO 5	0.24667	t*km	market for transport, freight, lorry, 16-32 metric ton, diesel, EURO 5 | transport, freight, lorry, 16-32 metric ton, diesel, EURO 5 | Cutoff, U - RER
	transport, freight, sea, container ship, heavy fuel oil	1.97336	t*km	market for transport, freight, sea, container ship, heavy fuel oil | transport, freight, sea, container ship, heavy fuel oil | Cutoff, U - GLO
	transport, freight, train, fleet average	0.24667	t*km	market for transport, freight, train, fleet average | transport, freight, train, fleet average | Cutoff, U - Europe without Switzerland
	Air conditioner	1	kg
	Flow	Amount	Unit	Provider	Description	Avoided waste
	Indoor unit	0.27	kg	indoor unit
	Outdoor unit	0.73	kg	outdoor unit
	Indoor unit	1	kg
	Flow	Amount	Unit	Provider	Description	Avoided waste
	acrylonitrile-butadiene-styrene copolymer	0.1158	kg	acrylonitrile-butadiene-styrene copolymer production | acrylonitrile-butadiene-styrene copolymer | Cutoff, U - RoW
	aluminium, cast alloy	0.0979	kg	aluminium ingot, primary, to aluminium, cast alloy market | aluminium, cast alloy | Cutoff, U - GLO
	capacitor, electrolyte type, > 2cm height	0.0125	kg	market for capacitor, electrolyte type, > 2cm height | capacitor, electrolyte type, > 2cm height | Cutoff, U - GLO
	copper, anode	0.1392	kg	market for copper, anode | copper, anode | Cutoff, U - GLO
	electronics, for control units	0.0552	kg	electronics production, for control units | electronics, for control units | Cutoff, U - RoW
	injection moulding	0.5654	kg	market for injection moulding | injection moulding | Cutoff, U - GLO
	metal working, average for aluminium product manufacturing	0.0979	kg	metal working, average for aluminium product manufacturing | metal working, average for aluminium product manufacturing | Cutoff, U - RoW
	metal working, average for copper product manufacturing	0.1392	kg	metal working, average for copper product manufacturing | metal working, average for copper product manufacturing | Cutoff, U - RoW
	metal working, average for steel product manufacturing	0.1298	kg	metal working, average for steel product manufacturing | metal working, average for steel product manufacturing | Cutoff, U - RoW
	plastic granulate, unspecified, recycled	0.0097	kg	market for plastic granulate, unspecified, recycled | plastic granulate, unspecified, recycled | Cutoff, U - IN
	polyester resin, unsaturated	0.0656	kg	polyester resin production, unsaturated | polyester resin, unsaturated | Cutoff, U - RoW
	polyethylene, high density, granulate	0.0662	kg	polyethylene production, high density, granulate | polyethylene, high density, granulate | Cutoff, U - RoW
	polypropylene, granulate	0.0406	kg	polypropylene production, granulate | polypropylene, granulate | Cutoff, U - RoW
	polystyrene, high impact	0.1668	kg	polystyrene production, high impact | polystyrene, high impact | Cutoff, U - RoW
	polyurethane, flexible foam	0.0501	kg	market for polyurethane, flexible foam | polyurethane, flexible foam | Cutoff, U - RoW
	steel, low-alloyed	0.1298	kg	market for steel, low-alloyed | steel, low-alloyed | Cutoff, U - GLO
	styrene-acrylonitrile copolymer	0.0505	kg	styrene-acrylonitrile copolymer production | styrene-acrylonitrile copolymer | Cutoff, U - RoW
	Outdoor unit	1	kg
	Flow	Amount	Unit	Provider	Description	Avoided waste
	aluminium, cast alloy	0.0648	kg	aluminium ingot, primary, to aluminium, cast alloy market | aluminium, cast alloy | Cutoff, U - GLO
	capacitor, electrolyte type, > 2cm height	0.0259	kg	market for capacitor, electrolyte type, > 2cm height | capacitor, electrolyte type, > 2cm height | Cutoff, U - GLO
	cast iron	0.0523	kg	cast iron production | cast iron | Cutoff, U - RoW
	copper, anode	0.206	kg	market for copper, anode | copper, anode | Cutoff, U - GLO
	electronics, for control units	0.0301	kg	electronics production, for control units | electronics, for control units | Cutoff, U - RoW
	inductor, ring core choke type	0.0829	kg	market for inductor, ring core choke type | inductor, ring core choke type | Cutoff, U - GLO
	injection moulding	0.0645	kg	injection moulding | injection moulding | Cutoff, U - RoW
	metal working, average for aluminium product manufacturing	0.0648	kg	metal working, average for aluminium product manufacturing | metal working, average for aluminium product manufacturing | Cutoff, U - RoW
	metal working, average for copper product manufacturing	0.206	kg	metal working, average for copper product manufacturing | metal working, average for copper product manufacturing | Cutoff, U - RoW
	metal working, average for metal product manufacturing	0.0523	kg	metal working, average for metal product manufacturing | metal working, average for metal product manufacturing | Cutoff, U - RoW
	metal working, average for steel product manufacturing	0.4736	kg	metal working, average for steel product manufacturing | metal working, average for steel product manufacturing | Cutoff, U - RoW
	plastic granulate, unspecified, recycled	0.0101	kg	market for plastic granulate, unspecified, recycled | plastic granulate, unspecified, recycled | Cutoff, U - IN
	polypropylene, granulate	0.0188	kg	polypropylene production, granulate | polypropylene, granulate | Cutoff, U - RoW
	steel, low-alloyed	0.4736	kg	market for steel, low-alloyed | steel, low-alloyed | Cutoff, U - GLO
	styrene-acrylonitrile copolymer	0.0147	kg	styrene-acrylonitrile copolymer production | styrene-acrylonitrile copolymer | Cutoff, U - RoW
	tetrafluoroethane, R134a	0.021	kg	refrigerant R134a production | tetrafluoroethane, R134a | Cutoff, U - RoW
	Flow	Amount	Unit	Provider	Description	Avoided product
	Outdoor unit	1	kg
	cooling in battery pack (air cooled)	1	Item(s)
	Flow	Amount	Unit	Provider	Description	Avoided waste
	aluminium alloy, AlMg3	1.64	kg	aluminium alloy production, AlMg3 | aluminium alloy, AlMg3 | Cutoff, U - RoW	cooling duct in battery pack for entire system
	fan, for power supply unit, desktop computer	0.13	kg	market for fan, for power supply unit, desktop computer | fan, for power supply unit, desktop computer | Cutoff, U - GLO
	metal working, average for aluminium product manufacturing	1.64	kg	market for metal working, average for aluminium product manufacturing | metal working, average for aluminium product manufacturing | Cutoff, U - GLO
	Battery rack (air cooling)	1	Item(s)
	Flow	Amount	Unit	Provider	Description	Avoided waste
	Battery pack	24	Item(s)	production of battery pack for CSS
	cable, unspecified	20.5155	kg	market for cable, unspecified | cable, unspecified | Cutoff, U - GLO
	High voltage control box	15.5	kg	High voltage control box (electronics for control units)
	Rack, 48x43, for stationary battery storage system, Li-Ion battery modules	494.7	kg	Rack, 48x43, for stationary battery storage system, Li-Ion battery modules
	transport, freight, lorry, 16-32 metric ton, diesel, EURO 6	0.0962	t*km	market for transport, freight, lorry, 16-32 metric ton, diesel, EURO 6 | transport, freight, lorry, 16-32 metric ton, diesel, EURO 6 | Cutoff, U - RoW
	transport, freight, train, fleet average	0.58	t*km	market group for transport, freight, train, fleet average | transport, freight, train, fleet average | Cutoff, U - GLO
	Battery pack	1	Item(s)		cell parameters are 0 or 1
	Flow	Amount	Unit	Provider	Description	Avoided waste
	03-NFM111 based SIB (Voß et al.)	NFM111 *11574.33/160.5	kg	production of 03-NFM111 based SIB	Specific energy: 160.5 Wh/kg Target storage capacity: 14 333.33 Wh
	Aluminium endbars, for module packaging, Li-Ion battery (Ellingsen)	0.9548	kg	Aluminium endbars, for module packaging, Li-Ion battery (Ellingsen)
	Bimetallic busbars and washers, for module packaging, Li-Ion battery (Ellingsen)	2.0289	kg	Bimetallic busbars and washers, for module packaging, Li-Ion battery (Ellingsen)
	Copper end-busbars, for module packaging, Li->Ion battery (Ellingsen)	0.2924	kg	Copper end-busbars, for module packaging, Li->Ion battery (Ellingsen)
	injection moulding	0.8491	kg	market for injection moulding | injection moulding | Cutoff, U - GLO
	LFP based LIB (Voß et al.)	LFP *14333.33/176.6	kg	production of LFP based LIB	Specific energy: 176.6 Wh/kg Target storage capacity: 14 333.33 Wh
	metal working factory	4.58e-10	Item(s)	market for metal working factory | metal working factory | Cutoff, U - GLO
	metal working, average for steel product manufacturing	8.6848	kg	market for metal working, average for steel product manufacturing | metal working, average for steel product manufacturing | Cutoff, U - GLO
	Mn-PBA based SIB (Voß et al.)	MnPBA *8586.54/142.2	kg	production of Mn-PBA based SIB	Specific energy: 142.2 Wh/kg Target storage capacity: 14 333.33 Wh
	NVPF based SIB (Voß et al.)	NVPF *10413.53/151.2	kg	production of NVPF based SIB	Specific energy: 152.2 Wh/kg Target storage capacity: 14 333.33 Wh
	polypropylene, granulate	0.8491	kg	market for polypropylene, granulate | polypropylene, granulate | Cutoff, U - GLO
	printed wiring board, surface mounted, unspecified, Pb free	0.1965	kg	market for printed wiring board, surface mounted, unspecified, Pb free | printed wiring board, surface mounted, unspecified, Pb free | Cutoff, U - GLO
	printed wiring board, through-hole mounted, unspecified, Pb free	0	kg	market for printed wiring board, through-hole mounted, unspecified, Pb free | printed wiring board, through-hole mounted, unspecified, Pb free | Cutoff, U - GLO
	steel, low-alloyed	8.6848	kg	market for steel, low-alloyed | steel, low-alloyed | Cutoff, U - GLO
	transport, freight, lorry, 16-32 metric ton, diesel, EURO 5	1.2157	t*km	market for transport, freight, lorry, 16-32 metric ton, diesel, EURO 5 | transport, freight, lorry, 16-32 metric ton, diesel, EURO 5 | Cutoff, U - RoW
	transport, freight, train, fleet average	7.2944	t*km	market group for transport, freight, train, fleet average | transport, freight, train, fleet average | Cutoff, U - GLO
	Rack, 48x43, for stationary battery storage system, Li-Ion battery modules	1	kg
	Flow	Amount	Unit	Provider	Description	Avoided waste
	metal working factory	4.58e-10	Item(s)	market for metal working factory | metal working factory | Cutoff, U - GLO
	metal working, average for steel product manufacturing	1	kg	market for metal working, average for steel product manufacturing | metal working, average for steel product manufacturing | Cutoff, U - GLO
	powder coat, steel	0.055	m2	market for powder coat, steel | powder coat, steel | Cutoff, U - GLO
	steel, low-alloyed	1	kg	market for steel, low-alloyed | steel, low-alloyed | Cutoff, U - GLO
	transport, freight, lorry, 16-32 metric ton, diesel, EURO 5	0.100531	t*km	market for transport, freight, lorry, 16-32 metric ton, diesel, EURO 5 | transport, freight, lorry, 16-32 metric ton, diesel, EURO 5 | Cutoff, U - RoW
	transport, freight, train, fleet average	0.603185	t*km	market group for transport, freight, train, fleet average | transport, freight, train, fleet average | Cutoff, U - GLO
	Container	1	Item(s)
	Flow	Amount	Unit	Provider	Description	Avoided waste
	Fire damper	2	Item(s)	Fire damper	Exclude?
	gypsum plasterboard	664.66	kg	market for gypsum plasterboard | gypsum plasterboard | Cutoff, U - GLO
	intermodal shipping container, 20-foot	1	Item(s)	market for intermodal shipping container, 20-foot | intermodal shipping container, 20-foot | Cutoff, U - GLO
	oriented strand board	0.76	m3	market for oriented strand board | oriented strand board | Cutoff, U - RoW
	plywood	0.14	m3	market for plywood | plywood | Cutoff, U - RoW
	polyurethane, flexible foam, flame retardant	2.5	kg	market for polyurethane, flexible foam, flame retardant | polyurethane, flexible foam, flame retardant | Cutoff, U - GLO
	steel, low-alloyed, hot rolled	5	kg	market for steel, low-alloyed, hot rolled | steel, low-alloyed, hot rolled | Cutoff, U - GLO
	transport, freight, lorry, 16-32 metric ton, diesel, EURO 5	2.3	t*km	market for transport, freight, lorry, 16-32 metric ton, diesel, EURO 5 | transport, freight, lorry, 16-32 metric ton, diesel, EURO 5 | Cutoff, U - RER
	transport, freight, sea, container ship, heavy fuel oil	18.4	t*km	market for transport, freight, sea, container ship, heavy fuel oil | transport, freight, sea, container ship, heavy fuel oil | Cutoff, U - GLO
	transport, freight, train, fleet average	2.3	t*km	market for transport, freight, train, fleet average | transport, freight, train, fleet average | Cutoff, U - Europe without Switzerland
	wood wool boards, cement bonded	0.19	m3	market for wood wool boards, cement bonded | wood wool boards, cement bonded | Cutoff, U - RoW
	zinc coat, coils	3.18	m2	market for zinc coat, coils | zinc coat, coils | Cutoff, U - GLO
	Fire damper	1	Item(s)
	Flow	Amount	Unit	Provider	Description	Avoided waste
	chemical, inorganic	0.9	kg	market for chemical, inorganic | chemical, inorganic | Cutoff, U - GLO
	electric motor, for electric scooter	1.2	kg	market for electric motor, for electric scooter | electric motor, for electric scooter | Cutoff, U - GLO
	glass fibre reinforced plastic, polyamide, injection moulded	0.09	kg	market for glass fibre reinforced plastic, polyamide, injection moulded | glass fibre reinforced plastic, polyamide, injection moulded | Cutoff, U - GLO
	injection moulding	0.09	kg	market for injection moulding | injection moulding | Cutoff, U - GLO
	plastic granulate, unspecified, recycled	0.09	kg	market for plastic granulate, unspecified, recycled | plastic granulate, unspecified, recycled | Cutoff, U - IN
	steel, chromium steel 18/8	0.06	kg	market for steel, chromium steel 18/8 | steel, chromium steel 18/8 | Cutoff, U - GLO
	steel, low-alloyed	0.12	kg	market for steel, low-alloyed | steel, low-alloyed | Cutoff, U - GLO
	steel, low-alloyed, hot rolled	4.14	kg	market for steel, low-alloyed, hot rolled | steel, low-alloyed, hot rolled | Cutoff, U - GLO
	synthetic rubber	0.02	kg	market for synthetic rubber | synthetic rubber | Cutoff, U - GLO
	zinc coat, coils	0.5	m2	market for zinc coat, coils | zinc coat, coils | Cutoff, U - GLO
	Fire supression system for 20 ft CSS	1	Item(s)
	Flow	Amount	Unit	Provider	Description	Avoided waste
	Fire extinguisher tank	21	kg	Production of fire extinguisher tanks
	Fire Suppression Panel	2.5	kg	Production of fire suppression panel
	metal working, average for steel product manufacturing	30	kg	market for metal working, average for steel product manufacturing | metal working, average for steel product manufacturing | Cutoff, U - GLO
	steel, low-alloyed	30	kg	market for steel, low-alloyed | steel, low-alloyed | Cutoff, U - GLO
	transport, freight, lorry, 16-32 metric ton, diesel, EURO 5	53500	kg*km	market for transport, freight, lorry, 16-32 metric ton, diesel, EURO 5 | transport, freight, lorry, 16-32 metric ton, diesel, EURO 5 | Cutoff, U - RER
	transport, freight, sea, container ship, heavy fuel oil	428000	kg*km	market for transport, freight, sea, container ship, heavy fuel oil | transport, freight, sea, container ship, heavy fuel oil | Cutoff, U - GLO
	transport, freight, train, fleet average	53500	kg*km	market for transport, freight, train, fleet average | transport, freight, train, fleet average | Cutoff, U - Europe without Switzerland
	Fire extinguisher tank	1	kg
	Flow	Amount	Unit	Provider	Description	Avoided waste
	heptafluoropropane (HFC)	0.7	kg	Production of heptafluoropropane
	steel, unalloyed	0.3	kg	market for steel, unalloyed | steel, unalloyed | Cutoff, U - GLO
	heptafluoropropane (HFC)	1	kg
	Flow	Amount	Unit	Provider	Description	Avoided waste
	electricity, medium voltage	5	kWh	market group for electricity, medium voltage | electricity, medium voltage | Cutoff, U - GLO
	heat, from steam, in chemical industry	20	MJ	steam production, as energy carrier, in chemical industry | heat, from steam, in chemical industry | Cutoff, U - RoW
	hydrogen fluoride	0.131	kg	market for hydrogen fluoride | hydrogen fluoride | Cutoff, U - RoW
	tetrafluoroethylene	0.981	kg	market for tetrafluoroethylene | tetrafluoroethylene | Cutoff, U - GLO
	Flow	Amount	Unit	Provider	Description	Avoided product
	heptafluoropropane (HFC)	1	kg
	tetrafluoroethylene	0.1	kg	market for tetrafluoroethylene | tetrafluoroethylene | Cutoff, U - GLO		TRUE
	hazardous waste, for incineration	0.02	kg	market for hazardous waste, for incineration | hazardous waste, for incineration | Cutoff, U - RoW
	Fire Suppression Panel	1	kg
	Flow	Amount	Unit	Provider	Description	Avoided waste
	acrylonitrile-butadiene-styrene copolymer	0.5472	kg	market for acrylonitrile-butadiene-styrene copolymer | acrylonitrile-butadiene-styrene copolymer | Cutoff, U - GLO
	cable, unspecified	0.088	kg	market for cable, unspecified | cable, unspecified | Cutoff, U - GLO
	polycarbonate	0.1159	kg	market for polycarbonate | polycarbonate | Cutoff, U - RoW
	printed wiring board, surface mounted, unspecified, Pb free	0.2488	kg	market for printed wiring board, surface mounted, unspecified, Pb free | printed wiring board, surface mounted, unspecified, Pb free | Cutoff, U - GLO
	Power conversion system for CSS	1	kg
	Mass balance based on the composition of the inverter in Jasper et al (2022). The weight of the casing is calculated by the outer dimensions (800 x 275 x 865 mm). A wall thickness of 1.5 mm is assumed, resulting in a weight of 27 kg of casing.
	Flow	Amount	Unit	Provider	Description	Avoided waste
	aluminium alloy, AlMg3	0.0858824	kg	market for aluminium alloy, AlMg3 | aluminium alloy, AlMg3 | Cutoff, U - GLO
	cable, unspecified	0.0143137	kg	market for cable, unspecified | cable, unspecified | Cutoff, U - GLO
	capacitor, electrolyte type, > 2cm height	0.0429412	kg	market for capacitor, electrolyte type, > 2cm height | capacitor, electrolyte type, > 2cm height | Cutoff, U - GLO
	capacitor, film type, for through-hole mounting	0.0572549	kg	market for capacitor, film type, for through-hole mounting | capacitor, film type, for through-hole mounting | Cutoff, U - GLO
	fan, for power supply unit, desktop computer	0.0143137	kg	market for fan, for power supply unit, desktop computer | fan, for power supply unit, desktop computer | Cutoff, U - GLO
	Inductor, other	0.386471	kg	production of inductor, other
	inductor, ring core choke type	0.100196	kg	market for inductor, ring core choke type | inductor, ring core choke type | Cutoff, U - GLO
	metal working, average for aluminium product manufacturing	0.0858824	kg	market for metal working, average for aluminium product manufacturing | metal working, average for aluminium product manufacturing | Cutoff, U - GLO
	metal working, average for steel product manufacturing	0.27	kg	market for metal working, average for steel product manufacturing | metal working, average for steel product manufacturing | Cutoff, U - GLO
	printed wiring board, through-hole mounted, unspecified, Pb containing	0	kg	market for printed wiring board, through-hole mounted, unspecified, Pb containing | printed wiring board, through-hole mounted, unspecified, Pb containing | Cutoff, U - GLO
	printed wiring board, through-hole mounted, unspecified, Pb free	0.0286275	kg	market for printed wiring board, through-hole mounted, unspecified, Pb free | printed wiring board, through-hole mounted, unspecified, Pb free | Cutoff, U - GLO
	steel, low-alloyed	0.27	kg	market for steel, low-alloyed | steel, low-alloyed | Cutoff, U - GLO
	transport, freight, lorry, 16-32 metric ton, diesel, EURO 5	1	t*km	market for transport, freight, lorry, 16-32 metric ton, diesel, EURO 5 | transport, freight, lorry, 16-32 metric ton, diesel, EURO 5 | Cutoff, U - RER
	transport, freight, sea, container ship, heavy fuel oil	8	t*km	market for transport, freight, sea, container ship, heavy fuel oil | transport, freight, sea, container ship, heavy fuel oil | Cutoff, U - GLO
	transport, freight, train, fleet average	1	t*km	market for transport, freight, train, fleet average | transport, freight, train, fleet average | Cutoff, U - Europe without Switzerland
	transformer, for grid connection	1	kg
	Flow	Amount	Unit	Provider	Description	Avoided waste
	base oil	0.14	kg	market for base oil | base oil | Cutoff, U - GLO
	copper, cathode	0.25	kg	market for copper, cathode | copper, cathode | Cutoff, U - GLO
	electronics, for control units	0.09	kg	market for electronics, for control units | electronics, for control units | Cutoff, U - GLO
	metal working, average for metal product manufacturing	0.31	kg	market for metal working, average for metal product manufacturing | metal working, average for metal product manufacturing | Cutoff, U - GLO
	metal working, average for steel product manufacturing	0.14	kg	market for metal working, average for steel product manufacturing | metal working, average for steel product manufacturing | Cutoff, U - GLO
	steel, 3.2% silicon alloy, for grain oriented electrical steel	0.31	kg	market for steel, 3.2% silicon alloy, for grain oriented electrical steel | steel, 3.2% silicon alloy, for grain oriented electrical steel | Cutoff, U - RER
	steel, low-alloyed	0.14	kg	market for steel, low-alloyed | steel, low-alloyed | Cutoff, U - GLO
	transformer, high voltage use	0.07	kg	market for transformer, high voltage use | transformer, high voltage use | Cutoff, U - GLO
	transport, freight, lorry, 16-32 metric ton, diesel, EURO 5	1	t*km	market for transport, freight, lorry, 16-32 metric ton, diesel, EURO 5 | transport, freight, lorry, 16-32 metric ton, diesel, EURO 5 | Cutoff, U - RER
	transport, freight, sea, container ship, heavy fuel oil	8	t*km	market for transport, freight, sea, container ship, heavy fuel oil | transport, freight, sea, container ship, heavy fuel oil | Cutoff, U - GLO
	transport, freight, train, fleet average	1	t*km	market for transport, freight, train, fleet average | transport, freight, train, fleet average | Cutoff, U - Europe without Switzerland
	wire drawing, copper	0.25	kg	market for wire drawing, copper | wire drawing, copper | Cutoff, U - GLO

## Sheet: Air-cooled CSS - EOL
All processes are waste treatment processes. Therefore the reference flow is an input and the listed flows outputs, unless specified otherwise.
Reference	used CSS (air cooled)	1	Item(s)
	Inputs
	Flow	Amount	Unit	Provider	Avoided waste
	used CSS (air cooled)	1	Item(s)
	transport, freight, lorry, 16-32 metric ton, diesel, EURO 5	500*24	t*km	market for transport, freight, lorry, 16-32 metric ton, diesel, EURO 5 | transport, freight, lorry, 16-32 metric ton, diesel, EURO 5 | Cutoff, U - RER
	Outputs
	Flow	Amount	Unit	Provider	Avoided product
	used air cooling system	1	Item(s)	treatment of used air cooling system
	Used battery rack for CSS (air cooled)	6	Item(s)	treatment of battery rack for CSS (air cooling)
	used container for CSS	1	Item(s)	treatment of used container for CSS
	used controller for CSS	30	kg	treatment of used controller for CSS
	used fire suppression system	1	Item(s)	treatment of used fire suppression system
	used PCS for CSS	600	kg	treatment of used PCS for CSS
	used transformer for CSS	4100	kg	treatment of used transformer for CSS
	waste concrete block	43.9	t	Treatment of concrete block
	used air cooling system	1	Item(s)
	Flow	Amount	Unit	Provider	Avoided product
	used air cooling unit	514	kg	treatment of used air cooling unit
	used cooling in battery pack (air cooled)	144	Item(s)	treatment of used cooling in battery pack (air cooled)
	used air cooling unit	1	kg
	Flow	Amount	Unit	Provider	Avoided product
	used indoor unit for AC	0.27	kg	treatment of indoor unit for AC
	used outdoor unit for AC	0.73	kg	treatment of used outdoor unit for AC
	used indoor unit for AC	1	kg
	Flow	Amount	Unit	Provider	Avoided product
	electronics scrap from control units	0.0552	kg	treatment of electronics scrap from control units_without steel housing_with credit - RoW
	used capacitor	0.0125	kg	treatment of used capacitor, to hazardous waste incineration, with energy recovery | used capacitor | Cutoff, U - RoW
	waste aluminium	0.0979	kg	Aluminium recycling
	waste copper	0.1392	kg	Copper recycling
	waste plastic, industrial electronics	0.5653	kg	treatment of waste plastic, industrial electronics, municipal incineration_with credit - GLO
	waste steel	0.1298	kg	steel recyling
	Aluminium Recycling	1	kg
	Inputs:
	Flow	Amount	Unit	Provider	Avoided waste
	waste aluminium	1	kg
	aluminium, wrought alloy	0.9911	kg	treatment of aluminium scrap, post-consumer, prepared for recycling, at remelter | aluminium, wrought alloy | Cutoff, U - RoW
	Outputs:
	Flow	Amount	Unit	Provider	Avoided product
	aluminium, wrought alloy	0.9911	kg	market for aluminium, wrought alloy | aluminium, wrought alloy | Cutoff, U - GLO	TRUE
	Copper Recycling	1	kg
	Inputs
	Flow	Amount	Unit	Provider	Avoided waste
	waste copper	1	kg
	copper, cathode	0.763359	kg	treatment of copper scrap by electrolytic refining | copper, cathode | Cutoff, U - RoW
	Outputs
	Flow	Amount	Unit	Provider	Avoided product
	copper, cathode	0.763359	kg	market for copper, cathode | copper, cathode | Cutoff, U - GLO	TRUE
	treatment of waste plastic with credit	1	kg
	Ecoinvent 3.11 process:
	Additional Outputs:
	Flow	Amount	Unit	Provider	Avoided product
	electricity, low voltage	4.5	MJ	market group for electricity, low voltage | electricity, low voltage | Cutoff, U - GLO	TRUE
	heat, district or industrial, natural gas	8.7	MJ	market group for heat, district or industrial, natural gas | heat, district or industrial, natural gas | Cutoff, U - GLO	TRUE
	Steel recycling	1	kg
	Inputs:
	Flow	Amount	Unit	Provider	Avoided waste
	waste steel	1	kg
	iron scrap, sorted, pressed	1	kg	sorting and pressing of iron scrap | iron scrap, sorted, pressed | Cutoff, U - RER
	steel, low-alloyed	1.21629	kg	steel production, electric, low-alloyed | steel, low-alloyed | Cutoff, U - RoW
	Outputs
	Flow	Amount	Unit	Provider	Avoided product
	steel, low-alloyed	1.21629	kg	market for steel, low-alloyed | steel, low-alloyed | Cutoff, U - GLO	TRUE
	used outdoor unit	1	kg
	Flow	Amount	Unit	Provider	Avoided product
	electronics scrap from control units	0.0301	kg	treatment of electronics scrap from control units_without steel housing_with credit - RoW
	used capacitor	0.0259	kg	treatment of used capacitor, to hazardous waste incineration, with energy recovery | used capacitor | Cutoff, U - RoW
	used inductor, ring core choke type	0.0829	kg	treatment of used inductor, ring core choke type
	waste aluminium	0.0648	kg	Aluminium recycling
	waste copper	0.206	kg	Copper recycling
	waste plastic, industrial electronics	0.0436	kg	treatment of waste plastic, industrial electronics, municipal incineration_with credit - GLO
	waste steel	0.5259	kg	steel recyling
	used inductor, ring ore choke type	1	kg
	Flow	Amount	Unit	Provider	Avoided product
	tinplate, in mixed metal scrap	0.08	kg	market for tinplate, in mixed metal scrap | tinplate, in mixed metal scrap | Cutoff, U - RoW	TRUE
	glass cullet, lead containing, from used cathode ray tube	0.27	kg	market for glass cullet, lead containing, from used cathode ray tube | glass cullet, lead containing, from used cathode ray tube | Cutoff, U - GLO
	waste copper	0.06	kg	Copper recycling
	waste plastic, industrial electronics	0.59	kg	treatment of waste plastic, industrial electronics, municipal incineration_with credit - GLO
	used cooling in battery pack	1	Item(s)
	Flow	Amount	Unit	Provider	Avoided product
	waste plastic, industrial electronics	0.13	kg	treatment of waste plastic, industrial electronics, municipal incineration_with credit - GLO
	waste aluminium	1.64	kg	Aluminium recycling
	used battery rack for CSS (air cooled)	1	Item(s)
	Flow	Amount	Unit	Provider	Avoided product
	electronics scrap from control units	15.5	kg	treatment of electronics scrap from control units_without steel housing_with credit - RoW
	Used battery pack for CSS	24	Item(s)	Treatment of battery pack for CSS (air cooled)
	used cable	20.2155	kg	treatment of used cable_ with credit - GLO
	waste steel	494.7	kg	steel recyling
	electronics scrap from control units_with credit	1	kg
	Flow	Amount	Unit	Provider	Avoided product
	used cable	0.08	kg	treatment of used cable_ with credit - GLO
	used printed wiring boards	0.14	kg	treatment of scrap printed wiring board mix_with credit
	waste plastic, industrial electronics	0.32	kg	treatment of waste plastic, industrial electronics, municipal incineration_with credit - GLO
	waste steel	0.46	kg	steel recyling
	used cable_ with credit	1	kg
	Inputs
	Flow	Amount	Unit	Provider	Avoided waste
	used cable	1	kg
	electricity, medium voltage	0.18	kWh	market group for electricity, medium voltage | electricity, medium voltage | Cutoff, U - GLO
	manual treatment facility, waste electric and electronic equipment	4e-10	Item(s)	market for manual treatment facility, waste electric and electronic equipment | manual treatment facility, waste electric and electronic equipment | Cutoff, U - GLO
	Outputs
	Flow	Amount	Unit	Provider	Avoided product
	waste copper	0.659779	kg	Copper recycling
	waste plastic, industrial electronics	0.338401	kg	treatment of waste plastic, industrial electronics, municipal incineration_with credit - GLO
	scrap printed wiring board mix_with credit	1	kg
	Flow	Amount	Unit	Provider	Avoided product
	used printed wiring boards	0.5	kg	treatment of scrap printed wiring boards (surface mounted) for battery pack, shredding and separation_ with credit - RoW
	used printed wiring boards	0.5	kg	treatment of scrap printed wiring boards (through-whole mounted) for PCS, shredding and separation_with credit - RoW
	scrap printed wiring boards (surface mounted) for battery pack, shredding and separation_ with credit	1	kg
	Inputs
	Flow	Amount	Unit	Provider	Avoided waste
	used printed wiring boards	1	kg
	manual treatment facility, waste electric and electronic equipment	4e-10	Item(s)	market for manual treatment facility, waste electric and electronic equipment | manual treatment facility, waste electric and electronic equipment | Cutoff, U - GLO
	electricity, medium voltage	0.04	kWh	Deutschland Markt medium Voltage 2023 (JB) Netzverluste integriert
	Outputs
	Flow	Amount	Unit	Provider	Avoided product
	copper, anode	0.37033*cu_from_PWB_rec_rate	kg	market for copper, anode | copper, anode | Cutoff, U - GLO	TRUE
	electronics scrap	1	kg	electronics scrap, Recycled Content cut-off | electronics scrap | Cutoff, U - GLO	TRUE
	gold	0.00219*au_from_PWB_rec_rate	kg	market for gold | gold | Cutoff, U - GLO	TRUE
	palladium	2.29E-5*pd_from_PWB_rec_rate	kg	market for palladium | palladium | Cutoff, U - GLO	TRUE
	silver	0.01199*ag_from_PWB_rec_rate	kg	market for silver | silver | Cutoff, U - GLO	TRUE
	scrap printed wiring boards (through-whole mounted) for PCS, shredding and separation_with credit	1	kg
	Inputs
	Flow	Amount	Unit	Provider	Avoided waste
	used printed wiring boards	1	kg
	manual treatment facility, waste electric and electronic equipment	4e-10	Item(s)	market for manual treatment facility, waste electric and electronic equipment | manual treatment facility, waste electric and electronic equipment | Cutoff, U - GLO
	electricity, medium voltage	0.04	kWh	Deutschland Markt medium Voltage 2023 (JB) Netzverluste integriert
	Outputs
	Flow	Amount	Unit	Provider	Avoided product
	copper, anode	0.19802*cu_from_PWB_rec_rate	kg
	electronics scrap	1	kg	electronics scrap, Recycled Content cut-off | electronics scrap | Cutoff, U - GLO	TRUE
	gold	0.00023*au_from_PWB_rec_rate	kg	market for gold | gold | Cutoff, U - GLO	TRUE
	palladium	5.13E-7*pd_from_PWB_rec_rate	kg	market for palladium | palladium | Cutoff, U - GLO	TRUE
	silver	0.0015*ag_from_PWB_rec_rate	kg	market for silver | silver | Cutoff, U - GLO	TRUE
	used battery pack	1	Item(s)
	Flow	Amount	Unit	Provider	Avoided product
	used printed wiring boards	0.1965	kg	treatment of scrap printed wiring boards (surface mounted) for battery pack, shredding and separation_ with credit - RoW
	waste aluminium	1.3761	kg	Aluminium recycling
	Waste Battery cell (LIB/SIB)	NFM111 *11574.33/160.5	kg	Pyromettalurgical treatment of battery cells (NFM111)
	Waste Battery cell (LIB/SIB)	LFP *14333.33/176.6	kg	Pyromettalurgical treatment of battery cells (LFP)
	Waste Battery cell (LIB/SIB)	MnPBA *8586.54/142.2	kg	Pyromettalurgical treatment of battery cells (MnPBA)
	Waste Battery cell (LIB/SIB)	NVPF *10413.53/151.2	kg	Pyromettalurgical treatment of battery cells (NVPF)
	waste copper	1.4401	kg	Copper recycling
	waste plastic, industrial electronics	1.2887	kg	treatment of waste plastic, industrial electronics, municipal incineration_with credit - GLO
	waste steel	8.6848	kg	steel recyling
	Waste Battery cell (LIB/SIB)	1	kg
	Inputs
	Flow	Amount	Unit	Provider	Avoided waste
	Waste Battery cell (LIB/SIB)	1	kg
	carbon black	0.001	kg	market for carbon black | carbon black | Cutoff, U - GLO
	electricity, medium voltage	1.24	kWh	Deutschland Markt medium Voltage 2023 (JB) Netzverluste integriert
	heat, district or industrial, natural gas	0.36	MJ	heat production, natural gas, at industrial furnace >100kW | heat, district or industrial, natural gas | Cutoff, U - Europe without Switzerland
	heat, district or industrial, other than natural gas	0.272	MJ	heat and power co-generation, diesel, 200kW electrical, SCR-NOx reduction | heat, district or industrial, other than natural gas | Cutoff, U - RoW
	hydrated lime, loose	0.01	kg	hydrated lime production, loose | hydrated lime, loose | Cutoff, U - RoW
	limestone, crushed, washed	0.15	kg	market for limestone, crushed, washed | limestone, crushed, washed | Cutoff, U - RoW
	quicklime, in pieces, loose	0.111	kg	market for quicklime, in pieces, loose | quicklime, in pieces, loose | Cutoff, U - RoW
	silica sand	0.186	kg	market for silica sand | silica sand | Cutoff, U - GLO
	tap water	0.298	kg	market for tap water | tap water | Cutoff, U - RoW
	transport, freight, lorry, >32 metric ton, diesel, EURO 4	0.13	t*km	market for transport, freight, lorry, >32 metric ton, diesel, EURO 4 | transport, freight, lorry, >32 metric ton, diesel, EURO 4 | Cutoff, U - RER
	transport, freight, sea, container ship, heavy fuel oil	0.27	t*km	market for transport, freight, sea, container ship, heavy fuel oil | transport, freight, sea, container ship, heavy fuel oil | Cutoff, U - GLO
	transport, freight, train, fleet average	0.24	t*km	market for transport, freight, train, fleet average | transport, freight, train, fleet average | Cutoff, U - Europe without Switzerland
	Outputs
	Flow	Amount	Unit	Provider	Avoided product
	Metal alloy waste	0.209	kg	Hydrometallurgical treatment of battery cells (NFM111)
	inert waste, for final disposal	0.952	kg	market for inert waste, for final disposal | inert waste, for final disposal | Cutoff, U - RoW
	Carbon dioxide	1051	kg
	Hydrometallurgical treatment of battery cells	0.209	kg
	Inputs
	Flow	Amount	Unit	Provider	Avoided waste
	Metal alloy waste	0.209	kg
	electricity, medium voltage	2.59	kWh	Deutschland Markt medium Voltage 2023 (JB) Netzverluste integriert
	heat, district or industrial, natural gas	4.79	MJ	heat production, natural gas, at industrial furnace >100kW | heat, district or industrial, natural gas | Cutoff, U - Europe without Switzerland
	hydrochloric acid, without water, in 30% solution state	0.008	kg	hydrochloric acid production, from the reaction of hydrogen with chlorine | hydrochloric acid, without water, in 30% solution state | Cutoff, U - RER
	hydrogen peroxide, without water, in 50% solution state	0.274	kg	market for hydrogen peroxide, without water, in 50% solution state | hydrogen peroxide, without water, in 50% solution state | Cutoff, U - RoW
	soda ash, dense	0.017	kg	market for soda ash, dense | soda ash, dense | Cutoff, U - GLO
	sodium hydroxide, without water, in 50% solution state	0.42	kg	market for sodium hydroxide, without water, in 50% solution state | sodium hydroxide, without water, in 50% solution state | Cutoff, U - RoW
	sulfuric acid	0.84	kg	market for sulfuric acid | sulfuric acid | Cutoff, U - RoW
	tap water	0.01	kg	market for tap water | tap water | Cutoff, U - RoW
	Outputs
	Flow	Amount	Unit	Provider	Avoided product
	waste aluminium	*	kg	Aluminium recycling
	waste copper	*	kg	Copper recycling
	waste plastic, industrial electronics	*	kg	treatment of waste plastic, industrial electronics, municipal incineration_with credit - GLO
	wastewater, average	0.00864	m3	market for wastewater, average | wastewater, average | Cutoff, U - Europe without Switzerland
	* Amount per kg cell	LFP	MnPBA	NVPF	NFM111
	Aluminium	0.184849	0.27559	0.243357	0.218342	kg
	Copper	0.094661	0.0251222	0.022184	0.0210376	kg
	PE	0.0816335	0.10968	0.0968519	0.0918472	kg
	used container for CSS	1	Item(s)
	Flow	Amount	Unit	Provider	Avoided product
	used fire damper	2	Item(s)	treatment of used fire damper
	waste gypsum plasterboard	664.66	kg	treatment of waste gypsum plasterboard, recycling | waste gypsum plasterboard | Cutoff, U - RoW
	waste plastic, industrial electronics	2.5	kg	treatment of waste plastic, industrial electronics, municipal incineration_with credit - GLO
	waste steel	2946.96	kg	steel recyling
	waste wood, post-consumer, waste process	655.9	kg	treatment of waste wood, post-consumer, sorting and shredding, incineration_with credit - RoW
	used fire damper	1	Item(s)
	Flow	Amount	Unit	Provider	Avoided product
	electronics scrap from control units	1.29	kg	treatment of electronics scrap from control units_with credit - RoW
	waste plastic, industrial electronics	0.18	kg	treatment of waste plastic, industrial electronics, municipal incineration_with credit - GLO
	waste rubber, unspecified	0.02	kg	market for waste rubber, unspecified | waste rubber, unspecified | Cutoff, U - RoW
	waste steel	4.32	kg	steel recyling
	waste wood, post-consumer, sorting and shredding, incineration_with credit	1	kg
	Inputs
	Flow	Amount	Unit	Provider	Avoided waste
	waste wood, post-consumer, waste process	1	kg
	sawmill	4.13568e-11	Item(s)	market for sawmill | sawmill | Cutoff, U - GLO
	tap water	0.0233628	kg	market for tap water | tap water | Cutoff, U - RoW
	tap water	0.00204157	kg	market for tap water | tap water | Cutoff, U - IN
	tap water	8.09633e-05	kg	market for tap water | tap water | Cutoff, U - CO
	tap water	5.31111e-05	kg	market for tap water | tap water | Cutoff, U - PE
	tap water	0.000151073	kg	market for tap water | tap water | Cutoff, U - ZA
	tap water	0.000406981	kg	market for tap water | tap water | Cutoff, U - BR
	tap water	0.0174091	kg	market for tap water | tap water | Cutoff, U - Europe without Switzerland
	tap water	4.89896e-05	kg	market for tap water | tap water | Cutoff, U - CA-QC
	wood chipping, industrial residual wood, stationary electric chipper	1	kg	market for wood chipping, industrial residual wood, stationary electric chipper | wood chipping, industrial residual wood, stationary electric chipper | Cutoff, U - GLO
	Outputs
	Flow	Amount	Unit	Provider	Avoided product
	waste building wood, chrome preserved	0.00150186	kg	market for waste building wood, chrome preserved | waste building wood, chrome preserved | Cutoff, U - RoW
	waste wood chips, from post consumer	1	kg	heat production, waste wood chips from industry, at furnace 300kW | heat, district or industrial, other than natural gas | Cutoff, U - RoW
	wastewater from particle board production	4.35546e-05	m3	market for wastewater from particle board production | wastewater from particle board production | Cutoff, U - RoW
	heat production, waste wood chips from industry, at furnace 300kW | heat, district or industrial, other than natural gas | Cutoff, U_with credit	1	kg
	Ecoinvent 3.11 process:	treatment of waste wood, post-consumer, sorting and shredding | wood chips, from post-consumer wood, measured as dry mass | Cutoff, U
	Additional Outputs:
	Flow	Amount	Unit	Provider	Avoided product
	heat, district or industrial, other than natural gas	1	MJ	market for heat, district or industrial, other than natural gas | heat, district or industrial, other than natural gas | Cutoff, U - Europe without Switzerland	TRUE
	used controller	1	kg
	Flow	Amount	Unit	Provider	Avoided product
	electronics scrap from control units	0.39	kg	treatment of electronics scrap from control units_with credit - RoW
	used liquid crystal display module	0.17	kg	market for used liquid crystal display module | used liquid crystal display module | Cutoff, U - RoW
	waste steel	0.44	kg	steel recyling
	used fire suppression system	1	Item(s)
	Flow	Amount	Unit	Provider	Avoided product
	used cable	0.22	kg	treatment of used cable_ with credit - GLO
	used printed wiring boards	0.622	kg	treatment of scrap printed wiring boards (surface mounted) for battery pack, shredding and separation_ with credit - RoW
	waste plastic, industrial electronics	1.6578	kg	treatment of waste plastic, industrial electronics, municipal incineration_with credit - GLO
	waste steel	30	kg	steel recyling
	used PCS for CSS	1	kg
	Flow	Amount	Unit	Provider	Avoided product
	used cable	0.0143	kg	treatment of used cable_ with credit - GLO
	used capacitor	0.1002	kg	treatment of used capacitor, to hazardous waste incineration, with energy recovery | used capacitor | Cutoff, U - RoW
	used inductor, ring core choke type	0.1002	kg	treatment of used inductor, ring core choke type
	used printed wiring boards	0.0286	kg	treatment of scrap printed wiring boards (through-whole mounted) for PCS, shredding and separation_with credit - RoW
	waste aluminium	0.0859	kg	Aluminium recycling
	waste copper	0.1662	kg	Copper recycling
	waste plastic, industrial electronics	0.0298	kg	treatment of waste plastic, industrial electronics, municipal incineration_with credit - GLO
	waste steel	0.2971+0.1778	kg	steel recyling
	used transformer for CSS	1	kg
	Flow	Amount	Unit	Provider	Avoided product
	electronics scrap from control units	0.09	kg	treatment of electronics scrap from control units_with credit - RoW
	waste copper	0.2574	kg	Copper recycling
	waste mineral oil	0.14	kg	treatment of waste mineral oil, hazardous waste incineration, with energy recovery | with credit - Europe without Switzerland
	waste plastic, industrial electronics	0.0273	kg	treatment of waste plastic, industrial electronics, municipal incineration_with credit - GLO
	waste steel	0.175+0.31	kg	steel recyling
	waste concrete block	1	kg
	Flow	Amount	Unit	Provider	Avoided product
	waste concrete	1	kg	treatment of waste concrete, inert material landfill | waste concrete | Cutoff, U - Europe without Switzerland
	treatment of waste mineral oil, hazardous waste incineration, with energy recovery | with credit	1	kg
	Ecoinvent 3.11 process:	treatment of waste mineral oil, hazardous waste incineration, with energy recovery | waste mineral oil | Cutoff, U
	Additional Outputs:
	Flow	Amount	Unit	Provider	Avoided product
	heat, district or industrial, other than natural gas	38	MJ	market for heat, district or industrial, other than natural gas | heat, district or industrial, other than natural gas | Cutoff, U - Europe without Switzerland	TRUE

## Sheet: Liquid-cooled CSS - Production
Only additional processes to air-cooled CSS listed. All processes are production processes. Therefore the reference flow is an output and the listed flows inputs, unless specified otherwise.
Reference	Full life cycle CSS (liquid cooled)	1	Item(s)
	Inputs
	Flow	Amount	Unit	Provider	Avoided waste
	CSS(liquid cooling)	1	Item(s)	CSS (liquid cooling)
	Outputs
	Flow	Amount	Unit	Provider	Avoided product
	Life cycle CSS	1	Item(s)
	used CSS (liquid cooled)	1	Item(s)	treatment of used CSS (liquid cooled)
	CSS (liquid cooled)	1	Item(s)
	Flow	Amount	Unit	Provider	Avoided waste
	Battery rack (liquid cooling)	8	Item(s)	Battery rack (liquid cooling)
	BESS controller	30	kg	BESS controller
	concrete block	43.9	t	concrete block production | concrete block | Cutoff, U - DE
	Container	1	Item(s)	Container
	Fire supression system for 20 ft CSS	1	Item(s)	Fire suppression system for 20ft CSS
	Liquid cooling system	1	Item(s)	Liquid cooling system
	Power conversion system for CSS	800	kg	Production of power conversion system for CSS
	transformer, for grid connection	5500	kg	transformer production, for grid connection
	Battery rack (liquid cooled)	1	Item(s)
	Flow	Amount	Unit	Provider	Avoided waste
	Battery pack	8	Item(s)	production of battery pack for CSS (for liquid cooling)
	cable, unspecified	17.907	kg	market for cable, unspecified | cable, unspecified | Cutoff, U - GLO
	High voltage control box	15.5	kg	High voltage control box (electronics for control units)
	Rack, 48x43, for stationary battery storage system, Li-Ion battery modules	431.8	kg	Rack, 48x43, for stationary battery storage system, Li-Ion battery modules
	transport, freight, lorry, 16-32 metric ton, diesel, EURO 6	0.0962	t*km	market for transport, freight, lorry, 16-32 metric ton, diesel, EURO 6 | transport, freight, lorry, 16-32 metric ton, diesel, EURO 6 | Cutoff, U - RoW
	transport, freight, train, fleet average	0.58	t*km	market group for transport, freight, train, fleet average | transport, freight, train, fleet average | Cutoff, U - GLO
	production of battery module for CSS	1	Item(s)
	Flow	Amount	Unit	Provider	Avoided waste
	03-NFM111 based SIB (Voß et al.)	NFM111 *37953/160.5	kg	production of 03-NFM111 based SIB
	Aluminium endbars, for module packaging, Li-Ion battery (Ellingsen)	3.1302	kg	Aluminium endbars, for module packaging, Li-Ion battery (Ellingsen)
	Bimetallic busbars and washers, for module packaging, Li-Ion battery (Ellingsen)	6.6517	kg	Bimetallic busbars and washers, for module packaging, Li-Ion battery (Ellingsen)
	Copper end-busbars, for module packaging, Li->Ion battery (Ellingsen)	0.9586	kg	Copper end-busbars, for module packaging, Li->Ion battery (Ellingsen)
	injection moulding	2.7838	kg	market for injection moulding | injection moulding | Cutoff, U - GLO
	LFP based LIB (Voß et al.)	LFP *47000/176.6	kg	production of LFP based LIB
	metal working factory	4.58e-10	Item(s)	market for metal working factory | metal working factory | Cutoff, U - GLO
	metal working, average for steel product manufacturing	28.4727	kg	market for metal working, average for steel product manufacturing | metal working, average for steel product manufacturing | Cutoff, U - GLO
	Mn-PBA based SIB (Voß et al.)	MnPBA *28156/142.2	kg	production of Mn-PBA based SIB
	NVPF based SIB (Voß et al.)	NVPF *34147/151.2	kg	production of NVPF based SIB
	polypropylene, granulate	2.7838	kg	market for polypropylene, granulate | polypropylene, granulate | Cutoff, U - GLO
	printed wiring board, through-hole mounted, unspecified, Pb free	0.6442	kg	market for printed wiring board, through-hole mounted, unspecified, Pb free | printed wiring board, through-hole mounted, unspecified, Pb free | Cutoff, U - GLO
	steel, low-alloyed	28.4727	kg	market for steel, low-alloyed | steel, low-alloyed | Cutoff, U - GLO
	transport, freight, lorry, 16-32 metric ton, diesel, EURO 5	3.9857	t*km	market for transport, freight, lorry, 16-32 metric ton, diesel, EURO 5 | transport, freight, lorry, 16-32 metric ton, diesel, EURO 5 | Cutoff, U - RoW
	transport, freight, train, fleet average	23.9144	t*km	market group for transport, freight, train, fleet average | transport, freight, train, fleet average | Cutoff, U - GLO
	liquid cooling system	1	Item(s)
	Flow	Amount	Unit	Provider	Avoided waste
	Air conditioner	37	kg	Air conditioner
	cable, connector for computer, without plugs	8	m	market for cable, connector for computer, without plugs | cable, connector for computer, without plugs | Cutoff, U - GLO
	cooling plate in battery pack (liquid cooling)	num_powersection*num_batterypack	Item(s)	production of cooling plate in battery pack (liquid cooling)
	drawing of pipe, steel	138.92	kg	market for drawing of pipe, steel | drawing of pipe, steel | Cutoff, U - GLO
	Liquid cooling unit	1	Item(s)	Liquid cooling unit
	nitrile-compound	0.75*num_batterypack*num_powersection	kg	market for nitrile-compound | nitrile-compound | Cutoff, U - GLO
	polyethylene, high density, granulate	1.37	kg	market for polyethylene, high density, granulate | polyethylene, high density, granulate | Cutoff, U - GLO
	secondary coolant for liquid cooling system	126.43	kg	Production of secondary coolant for liquid cooling system
	steel, chromium steel 18/8	138.92	kg	market for steel, chromium steel 18/8 | steel, chromium steel 18/8 | Cutoff, U - GLO
	transport, freight, lorry, 16-32 metric ton, diesel, EURO 5	1000*160	kg*km	market for transport, freight, lorry, 16-32 metric ton, diesel, EURO 5 | transport, freight, lorry, 16-32 metric ton, diesel, EURO 5 | Cutoff, U - RER
	transport, freight, sea, container ship, heavy fuel oil	8000*160	kg*km	market for transport, freight, sea, container ship, heavy fuel oil | transport, freight, sea, container ship, heavy fuel oil | Cutoff, U - GLO
	transport, freight, train, fleet average	1000*160	kg*km	market for transport, freight, train, fleet average | transport, freight, train, fleet average | Cutoff, U - Europe without Switzerland
	cooling plate in battery back (liquid cooling)	1	Item(s)
	Flow	Amount	Unit	Provider	Avoided waste
	aluminium alloy, AlMg3	5.2	kg	market for aluminium alloy, AlMg3 | aluminium alloy, AlMg3 | Cutoff, U - GLO
	metal working, average for aluminium product manufacturing	5.2	kg	market for metal working, average for aluminium product manufacturing | metal working, average for aluminium product manufacturing | Cutoff, U - GLO
	synthetic rubber	0.32	kg	market for synthetic rubber | synthetic rubber | Cutoff, U - GLO
	liquid cooling unit	1	Item(s)
	Flow	Amount	Unit	Provider	Avoided waste
	auxiliary heating unit, electric, 5kW	3	Item(s)	market for auxiliary heating unit, electric, 5kW | auxiliary heating unit, electric, 5kW | Cutoff, U - GLO
	brass	0.4	kg	market for brass | brass | Cutoff, U - RoW
	Compressor	44.36	kg	Compressor
	copper, anode	7.44	kg	market for copper, anode | copper, anode | Cutoff, U - GLO
	Filter drier	0.73	kg	Filter drier
	metal working, average for chromium steel product manufacturing	153.18	kg	market for metal working, average for chromium steel product manufacturing | metal working, average for chromium steel product manufacturing | Cutoff, U - GLO
	metal working, average for copper product manufacturing	7.44	kg	market for metal working, average for copper product manufacturing | metal working, average for copper product manufacturing | Cutoff, U - GLO
	metal working, average for metal product manufacturing	0.4	kg	market for metal working, average for metal product manufacturing | metal working, average for metal product manufacturing | Cutoff, U - GLO
	pump for liquid cooling unit	29.96	kg	Production of pump for liquid cooling unit
	steel, chromium steel 18/8	37.83	kg	market for steel, chromium steel 18/8 | steel, chromium steel 18/8 | Cutoff, U - GLO
	steel, chromium steel 18/8	34.46	kg	market for steel, chromium steel 18/8 | steel, chromium steel 18/8 | Cutoff, U - GLO
	steel, chromium steel 18/8, hot rolled	80.89	kg	market for steel, chromium steel 18/8, hot rolled | steel, chromium steel 18/8, hot rolled | Cutoff, U - GLO
	synthetic rubber	0.068	kg	market for synthetic rubber | synthetic rubber | Cutoff, U - GLO
	tetrafluoroethane, R134a	9	kg	market for tetrafluoroethane, R134a | tetrafluoroethane, R134a | Cutoff, U - GLO
	compressor	1	kg
	Flow	Amount	Unit	Provider	Avoided waste
	base oil	0.0404	kg	market for base oil | base oil | Cutoff, U - GLO
	copper, anode	0.1442	kg	market for copper, anode | copper, anode | Cutoff, U - GLO
	metal working, average for chromium steel product manufacturing	0.8154	kg	market for metal working, average for chromium steel product manufacturing | metal working, average for chromium steel product manufacturing | Cutoff, U - GLO
	metal working, average for copper product manufacturing	0.1442	kg	market for metal working, average for copper product manufacturing | metal working, average for copper product manufacturing | Cutoff, U - GLO
	reinforcing steel	0.8154	kg	market for reinforcing steel | reinforcing steel | Cutoff, U - GLO
	Filter drier	1	kg
	Flow	Amount	Unit	Provider	Avoided waste
	metal working, average for chromium steel product manufacturing	0.5325	kg	market for metal working, average for chromium steel product manufacturing | metal working, average for chromium steel product manufacturing | Cutoff, U - GLO
	steel, chromium steel 18/8	0.5325	kg	market for steel, chromium steel 18/8 | steel, chromium steel 18/8 | Cutoff, U - GLO
	zeolite, powder	0.4675	kg	market for zeolite, powder | zeolite, powder | Cutoff, U - GLO
	pump for liquid cooling unit	1	kg
	Flow	Amount	Unit	Provider	Avoided waste
	aluminium, cast alloy	0.4402	kg	market for aluminium, cast alloy | aluminium, cast alloy | Cutoff, U - GLO
	cast iron	0.4821	kg	market for cast iron | cast iron | Cutoff, U - GLO
	copper, anode	0.0777	kg	market for copper, anode | copper, anode | Cutoff, U - GLO
	metal working, average for aluminium product manufacturing	0.4402	kg	market for metal working, average for aluminium product manufacturing | metal working, average for aluminium product manufacturing | Cutoff, U - GLO
	metal working, average for copper product manufacturing	0.0777	kg	market for metal working, average for copper product manufacturing | metal working, average for copper product manufacturing | Cutoff, U - GLO
	metal working, average for metal product manufacturing	0.4821	kg	market for metal working, average for metal product manufacturing | metal working, average for metal product manufacturing | Cutoff, U - GLO
	secondaty coolant for liquid cooling system	1	kg
	Flow	Amount	Unit	Provider	Avoided waste
	ethylene glycol	0.5	kg	market for ethylene glycol | ethylene glycol | Cutoff, U - RoW
	water, deionised	0.5	kg	market for water, deionised | water, deionised | Cutoff, U - RoW

## Sheet: Liquid-cooled CSS - EOL
Only additional processes to air-cooled CSS listed. All processes are waste treatment processes. Therefore the reference flow is an input and the listed flows outputs, unless specified otherwise.
Reference	used battery pack for CSS (liquid cooled)	1	Item(s)
	Flow	Amount	Unit	Provider	Avoided product
	used printed wiring boards	0.6442	kg	treatment of scrap printed wiring boards (surface mounted) for battery pack, shredding and separation_ with credit - RoW
	waste aluminium	4.5114	kg	Aluminium recycling
	Waste Battery cell (LIB/SIB)	NVPF *34147/151.2	kg	Pyromettalurgical treatment of battery cells (NVPF)
	Waste Battery cell (LIB/SIB)	NFM111 *37953/160.5	kg	Pyromettalurgical treatment of battery cells (NFM111)
	Waste Battery cell (LIB/SIB)	LFP *47000/176.6	kg	Pyromettalurgical treatment of battery cells (LFP)
	Waste Battery cell (LIB/SIB)	MnPBA *28156/142.2	kg	Pyromettalurgical treatment of battery cells (MnPBA)
	waste copper	4.7213	kg	Copper recycling
	waste plastic, industrial electronics	4.2251	kg	treatment of waste plastic, industrial electronics, municipal incineration_with credit - GLO
	waste steel	28.4727	kg	steel recyling
	used battery rack for CSS (liquid cooled)	1	Item(s)
	Flow	Amount	Unit	Provider	Avoided product
	electronics scrap from control units	15.5	kg	treatment of electronics scrap from control units_with credit - RoW
	Used battery pack for CSS	8	Item(s)	Treatment of battery pack for CSS (liquid cooled)
	used cable	17.907	kg	treatment of used cable_ with credit - GLO
	waste steel	431.8	kg	steel recyling
	used cooling plate in battery pack	1	Item(s)
	Flow	Amount	Unit	Provider	Avoided product
	waste aluminium	5.2	kg	Aluminium recycling
	waste plastic, industrial electronics	0.32	kg	treatment of waste plastic, industrial electronics, municipal incineration_with credit - GLO
	used CSS (liquid cooled)	1	Items(S)
	Inputs
	Flow	Amount	Unit	Provider	Avoided waste
	used CSS (liquid cooled)	1	Item(s)
	transport, freight, lorry, 16-32 metric ton, diesel, EURO 5	14250	t*km	market for transport, freight, lorry, 16-32 metric ton, diesel, EURO 5 | transport, freight, lorry, 16-32 metric ton, diesel, EURO 5 | Cutoff, U - RER
	Outputs
	Flow	Amount	Unit	Provider	Avoided product
	Used battery rack for CSS (air cooled)	8	Item(s)	treatment of battery rack for CSS (liquid cooling)
	used container for CSS	1	Item(s)	treatment of used container for CSS
	used controller for CSS	30	kg	treatment of used controller for CSS
	used fire suppression system	1	Item(s)	treatment of used fire suppression system
	used liquid cooling system	1	Item(s)	treatment of used liquid cooling system
	used PCS for CSS	800	kg	treatment of used PCS for CSS
	used transformer for CSS	5500	kg	treatment of used transformer for CSS
	waste concrete block	43.9	t	Treatment of concrete block
	used ethylene glycol (recycling)	1.1	kg
	Inputs
	Flow	Amount	Unit	Provider	Avoided waste
	used ethylene glycol	1.1	kg
	at_coconut_carbon_powder	0.0462	kg	Primary_Pyrolysis_coconut (at)
	citric acid	0.0055	kg	market for citric acid | citric acid | Cutoff, U - GLO
	electricity, medium voltage	1	MJ	Deutschland Markt medium Voltage 2023 (JB) Netzverluste integriert
	heat, district or industrial, natural gas	1	MJ	market for heat, district or industrial, natural gas | heat, district or industrial, natural gas | Cutoff, U - Europe without Switzerland
	hydrochloric acid, without water, in 30% solution state	0.0138	kg	market for hydrochloric acid, without water, in 30% solution state | hydrochloric acid, without water, in 30% solution state | Cutoff, U - RER
	nitric acid, without water, in 50% solution state	0.0206	kg	market for nitric acid, without water, in 50% solution state | nitric acid, without water, in 50% solution state | Cutoff, U - Europe without Russia
	transport, freight, lorry, 16-32 metric ton, diesel, EURO 6	0.33	t*km	market for transport, freight, lorry, 16-32 metric ton, diesel, EURO 6 | transport, freight, lorry, 16-32 metric ton, diesel, EURO 6 | Cutoff, U - RER
	Outputs
	Flow	Amount	Unit	Provider	Avoided product
	ethylene glycol	1	kg	market for ethylene glycol | ethylene glycol | Cutoff, U - RER	TRUE
	used liquid cooling system	1	Item(s)
	Flow	Amount	Unit	Provider	Avoided product
	used air cooling unit	37	kg	treatment of used air cooling unit
	used cable	0.52	kg	treatment of used cable_ with credit - GLO
	used cooling plate in battery pack	144	Item(s)	treatment of used cooling plate in battery pack
	used liquid cooling unit	1	Item(s)	treatment of used liquid cooling unit
	used secondary coolant	126.43	kg	treatment of used secondary coolant
	waste plastic, industrial electronics	109.37	kg	treatment of waste plastic, industrial electronics, municipal incineration_with credit - GLO
	waste steel	138.92	kg	steel recyling
	used liquid cooling unit	1	Item(s)
	Flow	Amount	Unit	Provider	Avoided product
	used refrigerant R134a	9	kg	market for used refrigerant R134a | used refrigerant R134a | Cutoff, U - GLO
	waste aluminium	13.1824	kg	Aluminium recycling
	waste copper	16.7235	kg	Copper recycling
	waste mineral oil	1.7921	kg	treatment of waste mineral oil, hazardous waste incineration, with energy recovery | with credit - Europe without Switzerland
	waste plastic, industrial electronics	0.104	kg	treatment of waste plastic, industrial electronics, municipal incineration_with credit - GLO
	waste steel	208.289	kg	steel recyling
	waste zeolite	0.3431	kg	market for waste zeolite | waste zeolite | Cutoff, U - RoW
	used secondary coolant
	Inputs
	Flow	Amount	Unit	Provider	Avoided waste
	used secondary coolant	1	kg
	heat, district or industrial, natural gas	3	MJ
	Outputs
	Flow	Amount	Unit	Provider	Avoided product
	used ethylene glycol	0.5	kg	treatment of used ethylene glycol (recycling)
	wastewater, average	0.5	l	treatment of wastewater, average, wastewater treatment | wastewater, average | Cutoff, U - Europe without Switzerland

## Sheet: Numerical results of Figures
This sheet contains the numerical results of all Figures in the main manuscript.
Figure 4	in kg CO2 eq. / kWh storage capacity
		LFP		Mn-PBA		NVPF		NFM
		AC	LC	AC	LC	AC	LC	AC	LC
	Cells	95.4385	95.4386	68.696	68.6698	70.8408	70.8754	72.6579	72.6706
	Modules w/o cells	9.72283	6.57038	16.2362	10.9676	13.3786	9.04517	12.0383	8.13656
	Racks	8.04725	6.59292	13.4381	11.0053	11.073	9.0762	9.96372	8.16447
	PCS	9.06364	8.29227	15.1354	13.8419	12.4716	11.4156	11.2222	10.2689
	Container	5.10617	3.50371	8.52682	5.84858	7.0261	4.82341	6.32222	4.33888
	Transformer	15.2189	14.0086	24.9494	23.3839	20.5583	19.2851	18.4988	17.3478
	Concrete foundation	2.99653	2.05613	5.00391	3.4322	4.12322	2.83059	3.71016	2.54625
	Cooling system	4.42405	2.64364	7.38774	4.41291	6.0875	3.63939	5.47765	3.2738
	Fire suppression	1.10463	0.757966	1.84463	1.26524	1.51998	1.04346	1.3677	0.938643
	Others	0.36136	0.247954	0.603436	0.4139	0.497231	0.341349	0.447419	0.307059
	Sum	151.484	140.112	161.822	143.241	147.576	132.376	141.706	127.993
Figure 5	in g Sb eq. / kWh storage capacity
		LFP		Mn-PBA		NVPF		NFM
		AC	LC	AC	LC	AC	LC	AC	LC
	Cells	4.92372	4.92372	2.6748	2.67378	2.21505	2.21613	2.86059	2.86109
	Modules w/o cells	2.72486	1.14845	4.55026	1.91707	3.74941	1.58103	3.3738	1.42221
	Racks	0.836535	0.726369	1.39693	1.2125	1.15107	0.999963	1.03576	0.899514
	PCS	0.67373	0.616392	1.12506	1.02892	0.927053	0.848561	0.834181	0.763321
	Container	0.256912	0.176285	0.429018	0.294266	0.353511	0.242685	0.318096	0.218307
	Transformer	5.94717	5.47421	9.92842	9.13785	8.18102	7.53611	7.36144	6.77909
	Concrete foundation	0.0223058	0.0153056	0.0372486	0.025549	0.0306928	0.0210706	0.027618	0.018954
	Cooling system	0.763306	0.137196	1.27465	0.229016	1.05031	0.188873	0.945089	0.1699
	Fire suppression	0.0425705	0.0292106	0.0710886	0.04876	0.058577	0.0402131	0.0527088	0.0361735
	Others	0.0883573	0.0606282	0.147548	0.101204	0.12158	0.0834643	0.1094	0.0750801
	Sum	16.1911	13.2471	21.635	16.6689	17.8383	13.7581	16.9187	13.2436
Figure 6
	Air-cooled	C/4	C/2	1C	2C		in g CO2 eq. / kWh energy delivered
	0.5	16.345	17.7185	20.5648	47.2493
	1	13.6916	15.003	17.7185	43.0306
	1.5	12.4096	13.6916	16.345	41.0104
	1.7	12.4096	13.6916	16.345	41.0104
	Liquid-cooled	C/4	C/2	1C	2C		in g CO2 eq. / kWh energy delivered
	0.5	11.1561	12.4096	13.6916	28.3193
	1	8.73085	9.93014	11.1561	25.1012
	1.5	7.55734	8.73085	9.93014	23.5517
	1.7	7.55734	8.73085	9.93014	23.5517
	Air-cooled	C/4	C/2	1C	2C		in mg Sb eq. / kWh energy delivered
	0.5	0.682876	0.740261	0.859178	1.97403
	1	0.57202	0.626811	0.740261	1.79778
	1.5	0.51846	0.57202	0.682876	1.71337
	1.7	0.51846	0.57202	0.682876	1.71337
	Liquid-cooled	C/4	C/2	1C	2C		in mg Sb eq. / kWh energy delivered
	0.5	0.46609	0.51846	0.57202	1.18315
	1	0.364766	0.414872	0.46609	1.0487
	1.5	0.315739	0.364766	0.414872	0.983968
	1.7	0.315739	0.364766	0.414872	0.983968
Figure 7	in kg CO2 eq. / kWh storage capacity
		LFP		MnPBA		NVPF		NFM
		AC	LC	AC	LC	AC	LC	AC	LC
	Cells	0.333935	0.333935	-5.47865	-5.47655	-2.62053	-2.6218	-4.37376	-4.37453
	Modules w/o cells	-3.30777	-3.30708	-5.52365	-5.52036	-4.55149	-4.55272	-4.09589	-4.09576
	Racks	-1.53088	-1.26747	-2.55642	-2.11574	-2.10649	-1.74488	-1.90402	-1.57615
	PCS	-0.562596	-0.514716	-0.939481	-0.859193	-0.774133	-0.708588	-0.685321	-0.627106
	Container	-1.37341	-0.942394	-2.29346	-1.5731	-1.88981	-1.29735	-1.70039	-1.16696
	Transformer	-3.78447	-3.4835	-6.3197	-5.81485	-5.20743	-4.79559	-4.671	-4.30028
	Concrete foundation	0.13321	0.091405	0.222448	0.152578	0.183297	0.125834	0.164935	0.113193
	Cooling system	-1.68932	-0.773776	-2.821	-1.29163	-2.3245	-1.06523	-2.25148	-0.958216
	Fire suppression	-0.0425719	-0.0292116	-0.071091	-0.0487616	-0.0585789	-0.0402144	-0.0527409	-0.0361956
	Transport and others	1.05474	0.866091	1.76132	1.44573	1.45132	1.19231	1.3064	1.07286
	Net value	-10.7691	-9.02672	-24.0197	-21.1019	-17.8983	-15.5082	-18.2633	-15.9491
Figure 8	in g Sb eq. / kWh storage capacity
		LFP		MnPBA		NVPF		NFM
		AC	LC	AC	LC	AC	LC	AC	LC
	Cells	-1.9835	-1.9835	-0.209779	-0.209699	-0.0978932	-0.097941	-0.891384	-0.89154
	Modules w/o cells	-2.51852	-2.51799	-4.20568	-4.20318	-3.46548	-3.46642	-3.11831	-3.11821
	Racks	-0.733421	-0.650749	-1.22474	-1.08627	-1.00919	-0.895859	-0.899889	-0.798348
	PCS	-0.386107	-0.353247	-0.644762	-0.58966	-0.531284	-0.486301	-0.456002	-0.417266
	Container	-0.0314899	-0.0216074	-0.0525851	-0.0360684	-0.0433301	-0.0297461	-0.0387573	-0.0265988
	Transformer	-4.4729	-4.11718	-7.46932	-6.87264	-6.15472	-5.66796	-5.50496	-5.06805
	Concrete foundation	0.000199371	0.000136803	0.000332931	0.000228359	0.000274335	0.000188331	0.000246852	0.000169412
	Cooling system	-0.319977	-0.0269728	-0.53433	-0.0450244	-0.440288	-0.0371323	-0.39365	-0.0333185
	Fire suppression	-0.0458304	-0.0314474	-0.0765322	-0.0524938	-0.0630626	-0.0432924	-0.0567453	-0.0389437
	Transport and others	-0.0643743	-0.0436807	-0.107499	-0.0729142	-0.088579	-0.0601334	-0.0786531	-0.0533708
	Net value	-10.5559	-9.74624	-14.5249	-13.1677	-11.8935	-10.7846	-11.4381	-10.4455
Figure 9	in g CO2 eq. / kWh energy delivered
		LFP		MnPBA		NVPF		NFM
		AC	LC	AC	LC	AC	LC	AC	LC
	Production	30.5165	26.6576	32.599	27.2529	29.7293	25.1856	28.5468	24.3518
	Use Phase	17.7185	11.1561	17.7185	11.1561	17.7185	11.1561	17.7185	11.1561
	Replacement	7.00198	6.74623	5.19831	5.51272	7.10727	7.15773	12.0562	12.2655
	EOL	-2.16944	-1.71741	-4.83878	-4.01482	-3.60563	-2.95058	-3.67914	-3.03446
	Net Value	53.0675	42.8425	50.6771	39.9069	50.9494	40.5489	54.6422	44.7389
Figure 10	in mg Sb eq. / kWh energy delivered
		LFP		MnPBA		NVPF		NFM
		AC	LC	AC	LC	AC	LC	AC	LC
	Production	3.27951	2.53192	4.35839	3.1714	3.59353	2.6176	3.40828	2.51972
	Use Phase	0.740261	0.46609	0.740261	0.46609	0.740261	0.46609	0.740261	0.46609
	Replacement	0.21675	0.360052	0.197779	0.249347	0.222767	0.259747	0.352671	0.508272
	EOL	-2.12649	-1.85431	-2.92605	-2.50527	-2.39596	-2.05186	-2.30421	-1.98734
	Net Value	2.11002	1.50375	2.37038	1.38157	2.1606	1.29157	2.197	1.50674
Figure 11
	Air-cooled	LFP	Mn-PBA	NVPF	NFM		in g CO2 eq. / kWh energy delivered
	0.5	93.0982	88.1573	85.0628	82.1984
	1	53.0675	50.6771	50.9494	54.6422
	1.5	42.5609	39.9919	44.8518	48.9228
	1.7	41.8322	38.7648	43.8152	47.9692
	Liquid-cooled	LFP	Mn-PBA	NVPF	NFM		in g CO2 eq. / kWh energy delivered
	0.5	78.505	71.5926	69.7492	67.5729
	1	42.8425	39.9069	40.5489	44.7389
	1.5	33.5456	30.3911	35.3349	39.35
	1.7	34.134	30.2532	36.0931	40.7807
	Air-cooled	LFP	Mn-PBA	NVPF	NFM		in mg Sb eq. / kWh energy delivered
	0.5	3.66876	4.20137	3.65765	3.43931
	1	2.11002	2.37038	2.1606	2.197
	1.5	1.6752	1.83224	1.82391	1.88061
	1.7	1.63077	1.75765	1.76158	1.82273
	Liquid-cooled	LFP	Mn-PBA	NVPF	NFM		in mg Sb eq. / kWh energy delivered
	0.5	2.3917	2.33825	2.07066	1.97524
	1	1.50375	1.38157	1.29157	1.50674
	1.5	1.08504	1.05427	1.12558	1.21474
	1.7	1.07454	1.03632	1.10996	1.19912

## Sheet: Results in all EF categories
This sheet shows the cradle-to-gate results in all impact categories of the EF3.1 impact assessment method per kWh storage capacity. It complements section 3.1 of the manuscript.
			LFP				MnPBA				NVPF				NFM
			AC		LC		AC		LC		AC		LC		AC		LC
	Name	Unit	Overall Impact assessment result	per kWh storage capacity	Overall	per kWh storage capacity	Overall Impact assessment result	per kWh storage capacity	Overall	per kWh storage capacity	Overall Impact assessment result	per kWh storage capacity	Overall Impact assessment result	per kWh storage capacity	Overall Impact assessment result	per kWh storage capacity	Overall Impact assessment result	per kWh storage capacity
	Acidification	mol H+-Eq	3466.52	1.67952	4649.85	1.54583	2280.1	1.84474	2920.8	1.62087	2343.02	1.56201	3012.5	1.37872	2548.79	1.52897	3312.37	1.36368
	Climate change	kg CO2-Eq	312663	151.484	421457	140.112	200586	162.286	258121	143.241	221939	147.959	289241	132.376	236799	142.051	310895	127.993
	Climate change: biogenic	kg CO2-Eq	1205.15	0.583891	1503.01	0.499671	1134.46	0.91785	1399.99	0.77691	1138.14	0.758757	1405.35	0.643179	1174.93	0.704819	1458.97	0.600647
	Climate change: fossil	kg CO2-Eq	311036	150.696	419392	139.426	199140	161.117	256319	142.241	220480	146.986	287419	131.542	235258	141.127	308956	127.195
	Climate change: land use and land use change	kg CO2-Eq	421.263	0.2041	562.006	0.186837	311.523	0.252041	402.076	0.223128	321.143	0.214096	416.097	0.190434	365.309	0.219142	480.46	0.197802
	Ecotoxicity: freshwater	CTUe	4.10188e+06	1987.34	5.23598e+06	1740.69	2.7494e+06	2224.43	3.26493e+06	1811.84	2.84943e+06	1899.62	3.41072e+06	1560.97	2.87797e+06	1726.44	3.45231e+06	1421.29
	Ecotoxicity: freshwater, inorganics	CTUe	4.03541e+06	1955.14	5.1463e+06	1710.87	2.70114e+06	2185.39	3.2018e+06	1776.8	2.76994e+06	1846.63	3.30207e+06	1511.24	2.83084e+06	1698.16	3.39081e+06	1395.97
	Ecotoxicity: freshwater, organics	CTUe	66470.3	32.2046	89677.8	29.8131	48254.6	39.0409	63131	35.0339	79491.5	52.9943	108655	49.7277	47134.7	28.2752	61498.9	25.3186
	Energy resources: non-renewable	MJ, net calorific value	3.9046e+06	1891.76	5.27607e+06	1754.01	2.59594e+06	2100.28	3.36888e+06	1869.52	2.82905e+06	1886.03	3.70862e+06	1697.31	3.02848e+06	1816.73	3.99924e+06	1646.46
	Eutrophication: freshwater	kg P-Eq	237.212	0.114928	304.909	0.101366	173.301	0.140211	211.767	0.117518	178.157	0.118771	218.844	0.100158	181.208	0.108703	223.29	0.0919266
	Eutrophication: marine	kg N-Eq	422.752	0.204822	569.011	0.189166	270.685	0.219001	347.393	0.192782	286.386	0.190924	370.277	0.169463	304.457	0.182638	396.612	0.163282
	Eutrophication: terrestrial	mol N-Eq	4555.55	2.20715	6099.6	2.02779	2964.35	2.39834	3780.65	2.09803	3172.73	2.11516	4084.34	1.86927	3369.89	2.02153	4371.66	1.79978
	Human toxicity: carcinogenic	CTUh	0.00033548	1.62539e-07	0.000443492	1.47438e-07	0.000253101	2.04774e-07	0.000323437	1.79488e-07	0.000272389	1.81593e-07	0.000351548	1.60891e-07	0.000276501	1.65867e-07	0.000357538	1.47195e-07
	Human toxicity: carcinogenic, inorganics	CTUh	0.00023212	1.12461e-07	0.00030496	1.01383e-07	0.000165667	1.34035e-07	0.000208113	1.1549e-07	0.000169954	1.13303e-07	0.000214361	9.81058e-08	0.000174327	1.04576e-07	0.000220734	9.08746e-08
	Human toxicity: carcinogenic, organics	CTUh	0.000103359	5.00773e-08	0.000138533	4.60547e-08	8.74342e-05	7.07397e-08	0.000115324	6.39977e-08	0.000102435	6.82902e-08	0.000137186	6.27855e-08	0.000102173	6.12916e-08	0.000136803	5.63209e-08
	Human toxicity: non-carcinogenic	CTUh	0.0213709	1.03541e-05	0.0281022	9.34248e-06	0.0153469	1.24166e-05	0.019323	1.07231e-05	0.0154308	1.02872e-05	0.0194453	8.89943e-06	0.0158228	9.49178e-06	0.0200165	8.24064e-06
	Human toxicity: non-carcinogenic, inorganics	CTUh	0.0200789	9.72815e-06	0.0263996	8.77645e-06	0.014396	1.16472e-05	0.0181175	1.00541e-05	0.0144697	9.64646e-06	0.0182249	8.34093e-06	0.0148597	8.91403e-06	0.0187933	7.73703e-06
	Human toxicity: non-carcinogenic, organics	CTUh	0.00129202	6.25978e-07	0.0017026	5.66025e-07	0.000950968	7.69392e-07	0.00120557	6.69018e-07	0.000961092	6.40728e-07	0.00122033	5.58501e-07	0.000963111	5.77751e-07	0.00122327	5.03609e-07
	Ionising radiation: human health	kBq U235-Eq	16931.4	8.20322	21844.8	7.26224	12020.6	9.72536	14687.9	8.15087	12295.7	8.19711	15088.8	6.90564	16806.6	10.0819	21662.8	8.9184
	Land use	dimensionless	1.74842e+06	847.102	2.27171e+06	755.222	1.17784e+06	952.945	1.44017e+06	799.205	1.23252e+06	821.678	1.51986e+06	695.586	1.27519e+06	764.959	1.58203e+06	651.311
	Material resources: metals/minerals	kg Sb-Eq	33.6008	0.0162795	40.0298	0.0133078	26.7443	0.0216378	30.0374	0.0166689	26.7608	0.0178406	30.0615	0.0137581	28.2069	0.0169207	32.1688	0.0132436
	Ozone depletion	kg CFC-11-Eq	0.213075	0.000103234	0.293583	9.76006e-05	0.15744	0.000127379	0.212503	0.000117926	0.191398	0.000127599	0.261993	0.000119905	0.196693	0.000117992	0.269708	0.000111037
	Particulate matter formation	disease incidence	0.0256999	1.24515e-05	0.0349132	1.16068e-05	0.0159965	1.29421e-05	0.0207718	1.15271e-05	0.0179587	1.19724e-05	0.0236315	1.08153e-05	0.018748	1.12466e-05	0.0247817	1.02024e-05
	Photochemical oxidant formation: human health	kg NMVOC-Eq	1477.01	0.715607	1976.58	0.657107	1009.2	0.816501	1294.8	0.718534	1086.03	0.724019	1406.78	0.643833	1144.25	0.686415	1491.62	0.61409
	Water use	m3 world Eq deprived	102084	49.4595	136404	45.3471	68286.3	55.2478	87148.1	48.3619	69385.6	46.257	88750.2	40.6179	139918	83.9339	191541	78.8559

## Sheet: EOL approach
This sheet describes the EOL approach taken in this study in more detail.
	The study does not strictly follow the end-of-life with substitution approach presented in literature. This approach would mean a production exclusively based on primary virgin material, an adequate recycling process at the end of life and a crediting of only primary material (compare Nordelöf et al. (2019), Figure 1; 10.3390/batteries5030051). It is particularly important that both, the provider…
